# 1 **Timing of ESCRT-III protein recruitment and membrane scission** 2 **during HIV-1 assembly**

3 Daniel S. Johnson<sup>1,2</sup>, Marina Bleck<sup>1</sup>, Sanford M. Simon<sup>1</sup>

4 <sup>1</sup>Laboratory of Cellular Biophysics, The Rockefeller University, New York, NY 10065, USA

5 <sup>2</sup>Department of Physics and Astronomy, Hofstra University, Hempstead, NY 11549, USA

6 **The Endosomal Sorting Complexes Required for Transport III (ESCRT-III) proteins are**  
7 **critical for cellular membrane scission processes with topologies inverted relative to**  
8 **clathrin-mediated endocytosis. Some viruses appropriate ESCRT-IIIs for their release. By**  
9 **imaging single assembling viral-like particles of HIV-1, we observed that ESCRT-IIIs and**  
10 **the ATPase VPS4 arrive after most of the virion membrane is bent, linger for tens of**  
11 **seconds, and depart ~20 seconds before scission. These observations suggest ESCRT-IIIs**  
12 **are recruited by a combination of membrane curvature and the late domains of the HIV-1**  
13 **Gag protein. ESCRT-IIIs may pull the neck into a narrower form but must leave to allow**  
14 **scission. If scission does not occur within minutes of ESCRT departure, ESCRT-III and**  
15 **VPS4 are recruited again. This mechanistic insight is likely relevant for other ESCRT**  
16 **dependent scission processes including cell division, endosome tubulation, multivesicular**  
17 **body and nuclear envelope formation, and secretion of exosomes and ectosomes.**

18

## 19 **Introduction**

20 ESCRTs are categorized into groups -0 through -III and act in various cellular processes  
21 including cell division, multivesicular body formation, and wound repair (Hurley, 2015). An  
22 investigation of protein sorting between endosomes and lysosomes initially led to the discovery  
23 of ESCRT-I (Katzmann et al., 2001), with other ESCRTs identified soon afterwards (Babst et al.,  
24 2002a; Babst et al., 2002b; Katzmann et al., 2003). Sequential recruitment of the ESCRTs  
25 enables division of membrane compartments, with ESCRT-III being critical for the membrane  
26 scission process (Henne et al., 2013). ESCRT-IIIs have a five alpha-helix core structure and  
27 assemble *in vitro* into macromolecular rings or spirals (McCullough et al., 2015; Muziol et al.,  
28 2006). ESCRT-IIIs are believed to polymerize in the neck of the membrane constriction to drive  
29 membrane fission (Cashikar et al., 2014; Dobro et al., 2013; Fabrikant et al., 2009; Hanson et al.,  
30 2008; Henne et al., 2012; Lata et al., 2008; McCullough et al., 2015).

31 Scission of the membrane, even in the presence of ESCRT-IIIs, stalls in the absence of  
32 the hexameric AAA<sup>+</sup> ATPase (Morita et al., 2010), VPS4A/B, which contains a microtubule  
33 interacting and transport (MIT) domain that binds to MIT interacting motifs (MIM) of ESCRT-  
34 IIIs (Obita et al., 2007; Stuchell-Brereton et al., 2007). The final scission process is believed to  
35 be associated with VPS4 working on ESCRT-IIIs, but the mechanism is still unresolved. In some  
36 models the ESCRT-IIIs provide the motive force for scission and the VPS4 is required after  
37 scission to recycle the ESCRT-IIIs for subsequent scissions (Lata et al., 2008; Wollert et al.,  
38 2009). In other models the VPS4 is actively engaging the ESCRT-IIIs prior or during scission by  
39 actively remodeling ESCRT-IIIs in order to force scission (Saksena et al., 2009), by rearranging  
40 ESCRT-IIIs as part of the pathway towards scission (Cashikar et al., 2014), or by binding to  
41 ESCRT dome structures in order to add rigidity necessary for scission (Fabrikant et al., 2009).

42 ESCRT complexes are hijacked by HIV to enable separation of the viral particle from the  
43 host cell plasma membrane. The production of enveloped HIV-1 at the plasma membrane occurs  
44 with the recruitment of the structural protein Gag at individual assembly sites. The carboxyl  
45 terminus of Gag has a motif that is essential for recruitment of ESCRTs. First Gag recruits the  
46 “early” ESCRTs which contribute to subsequent recruitment of ESCRT-III proteins. The  
47 ESCRT-IIIs then polymerize into structures that are believed to constrict the neck and drive  
48 membrane fission. HIV release appears to require fewer members of the ESCRT family than  
49 other processes. Redundancy likely makes many variants, such as CHMP5, CHMP6 and  
50 CHMP7, only conditionally necessary (Morita et al., 2011). ESCRT-IIIs that are essential for  
51 assembly of HIV-1 include CHMP2 (either A or B variant) and CHMP4B, which are recruited to  
52 site of budding with other proteins such as ALIX and TSG101 which interact with Gag (Morita  
53 et al., 2011). The reduced number of required ESCRTs makes HIV assembly an approachable  
54 system for studying the biophysics of ESCRT mediated membrane scission.

55 Prior to viral particle separation from a host cell, a roughly spherical particle is formed  
56 (Martin-Serrano et al., 2003), but the topological pathway and timing of events to reaching the  
57 Gag sphere has not previously been followed *in vivo*. The order of some of the events in virion  
58 assembly has been resolved by live-cell microscopy. First the HIV- genome is recruited to the  
59 membrane, potentially with a few Gag molecules (Jouvenet et al., 2009). Then, over a 5-30  
60 minute period, the Gag accumulates around the genome (Ivanchenko et al., 2009; Jouvenet et al.,  
61 2008). Once Gag reaches a steady-state, ESCRT-III and VPS4 are transiently recruited at the site  
62 of assembly (Baumgartel et al., 2011; Bleck et al., 2014; Jouvenet et al., 2011). The timing of  
63 some critical steps is not known impacting our understanding of the mechanism. It is not known  
64 whether bending occurs before, during, or after the transient recruitment of ESCRTs. Thus, is  
65 membrane bending driven by Gag multimerization, by Gag engagement with the HIV-1 genome  
66 or by the ESCRTs? It is also not known if scission occurs before, during or after the transient  
67 recruitment of ESCRT-IIIs or VPS4. Do they generate the force for scission, do they prepare the  
68 membrane for scission, or does VPS4 recycle ESCRT-IIIs after scission?

69 Here we investigated, during the assembly of HIV Gag, the temporal recruitment of  
70 ESCRT-III proteins and VPS4 relative to membrane scission. We also examined membrane  
71 curvature during Gag assembly to determine when a spherical particle forms relative to ESCRT-  
72 III recruitment. We find that membrane bending occurs contemporaneous with recruitment of  
73 Gag and prior to arrival ESCRT-III. The ESCRT-IIIs and the VPS4 ATPase arrive after Gag  
74 assembly has concluded, remain at the membrane for tens of seconds, and then leave tens of  
75 seconds before scission. During the period after departure of the ESCRT-IIIs, neutralizing the  
76 surface charge on the membrane accelerates the membrane scission.

77

## 78 **Results**

### 79 **ESCRT-IIIs appear and disappear from site of virus-like particle assembly prior to** 80 **scission.**

81 To determine the timing of ESCRT recruitment relative to membrane bending and  
82 scission, we quantified ESCRT recruitment during the assembly of HIV-1 virus like particles  
83 (VLPs) while assaying membrane bending and scission. Scission was assayed by monitoring the  
84 ability of protons to flow between the cytosol and the lumen of the virion. The pH in the lumen  
85 of the virion was monitored with a pH-sensitive GFP (pHlourin) (Miesenbock et al., 1998) fused

86 to Gag (Jouvenet et al., 2008) while modulating the cytoplasmic pH by cycling the pCO<sub>2</sub> every  
87 10 s between 0% and 10%, thus an average of 5% pCO<sub>2</sub> (Figure 1 – figure supplement 1). CO<sub>2</sub>  
88 rapidly diffuses across plasma membranes (Hulikova and Swietach, 2014; Simon et al., 1994)  
89 and is converted to carbonic acid by cytoplasmic carbonic anhydrase, altering the cytoplasmic  
90 pH. We have previously observed that Gag-pHluorin in a budded VLP is less sensitive to  
91 changes of pCO<sub>2</sub> than in the cytosol, suggesting carbonic anhydrase is excluded from VLPs  
92 (Jouvenet et al., 2008).

93 At sites of VLP assembly the average Gag-pHluorin fluorescence increase was similar to  
94 the increase of Gag-mEGFP (Jouvenet et al., 2008), but the intensity oscillated in sync with  
95 switching the pCO<sub>2</sub> (Figure 1A, Figure 1 – figure supplement 2). At various times after Gag  
96 accumulation reached a steady-state maximum the magnitude of oscillations decreased,  
97 indicating a loss of the ability of protons to move between the VLP and cytoplasm due to  
98 scission. Not surprisingly, scission was never observed before Gag had finished accumulating at  
99 individual VLPs. Unexpectedly the ESCRT-III CHMP4B both appeared (Avg=59s, N=30 out of  
100 30) and disappeared (Avg=22s, N=27 out of 30) prior to scission (Figure 1B).

101 CHMP4B has been proposed to form a circular/spiral structure which supports assembly  
102 of a smaller CHMP2(A/B) dome which generates fission by pulling the neck together (Fabrikant  
103 et al., 2009). Thus, it is possible that CHMP4B may be removed prior to scission leaving  
104 CHMP2A or CHMP2B present to facilitate fission. To probe the timing of CHMP2, endogenous  
105 CHMP2A and CHMP2B were lowered with siRNA (Figure 1 – figure supplement 3) to facilitate  
106 observation of mCherry-CHMP2A or mCherry-CHMP2B (Figure 1C and E, Figure 1 – figure  
107 supplement 2). CHMP2A and CHMP2B both appeared (Avg.=77s, N=29 out of 29; and 63s,  
108 N=23 out of 23, respectively) and disappeared prior to scission (Avg. = 23s, N=26 out of 29; and  
109 27s, N=23 out of 23, respectively Figure 1D,F). This observation indicates their assembly and  
110 disassembly is also not physically forcing scission.

111 Next the dynamics of recruitment of VPS4, the energy providing ATPase, was monitored  
112 (Figure 1G and Figure 1 – figure supplement 2). Similar to the ESCRT-IIIs, VPS4A also  
113 appeared prior to scission (Avg=42s, N=28 out of 28) and disappeared prior to scission  
114 (Avg=17s, N=27 out of 28, Figure 1H). On average VPS4A disappeared from the assembly site  
115 closer to the time of scission than CHMP4B (5 s), CHMP2A (6 s) or CHMP2B (10 s). A  
116 simultaneous measurement of CHMP4B and VPS4A confirmed CHMP4B was recruited ~5 s  
117 prior to VPS4A (N=41) (Figure 1 – figure supplement 4), which agrees with previous results in  
118 HeLa cells (Bleck et al., 2014).

119

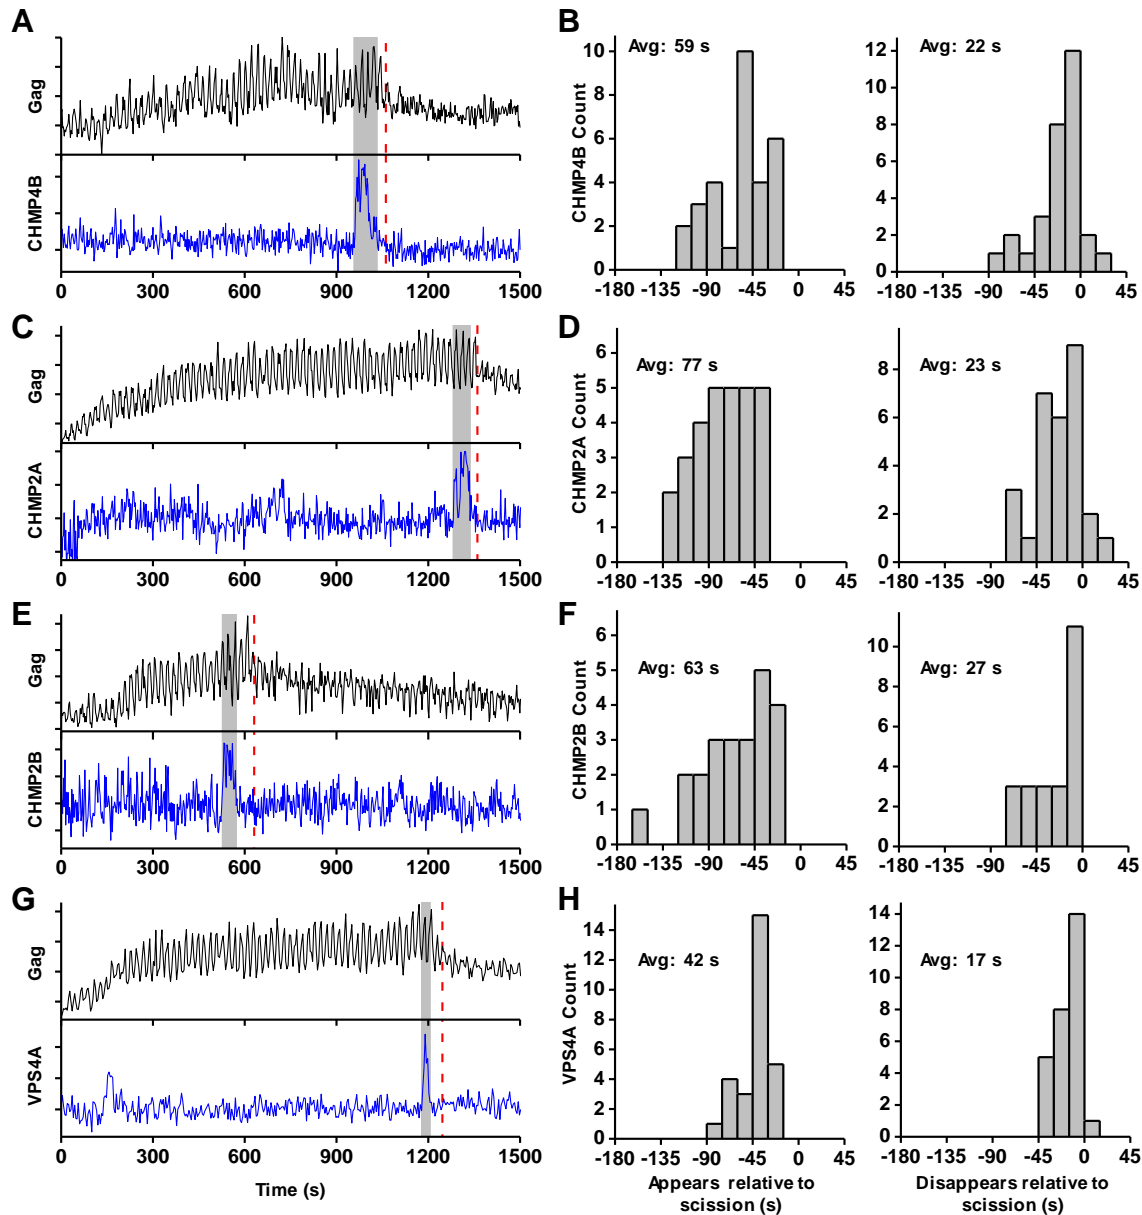

120

121 **Figure 1.** ESCRT-IIIs and VPS4A transiently recruited prior to scission. (A) Example trace of  
 122 Gag-pHluorin assembling into single VLP while the pCO<sub>2</sub> in the imaging media was repeatedly  
 123 switched between 0% and 10% every 10 s. Moment of scission is indicated by red dashed line.  
 124 CHMP4B-mCherry was temporarily recruited (indicated by grey zone) to the site of VLP  
 125 assembly following the loss of pH modulation sensitivity. (B) Histograms of appearance and  
 126 disappearance of CHMP4B prior to scission. (C-H) Example traces and histograms of  
 127 appearance and disappearance, relative to scission of the VLP, for mCherry-CHMP2A (C and  
 128 D), mCherry-CHMP2B (E and F) and mCherry-VPS4A (G and H).

129

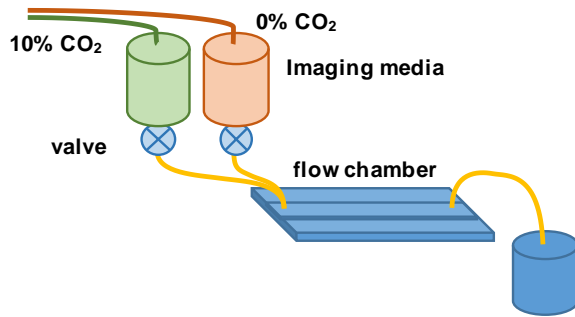

130

131 **Figure 1 – figure supplement 1.** Flow chamber configuration for ESCRT-III assisted membrane  
132 scission studies. Imaging media in reservoirs was preequilibrated with gas containing 0% and  
133 10% CO<sub>2</sub> (balanced with air). During assembly of single HIV particles in cells the imaging  
134 media was modulated between reservoirs, enabling detection of scission of the VLP from the  
135 cell.

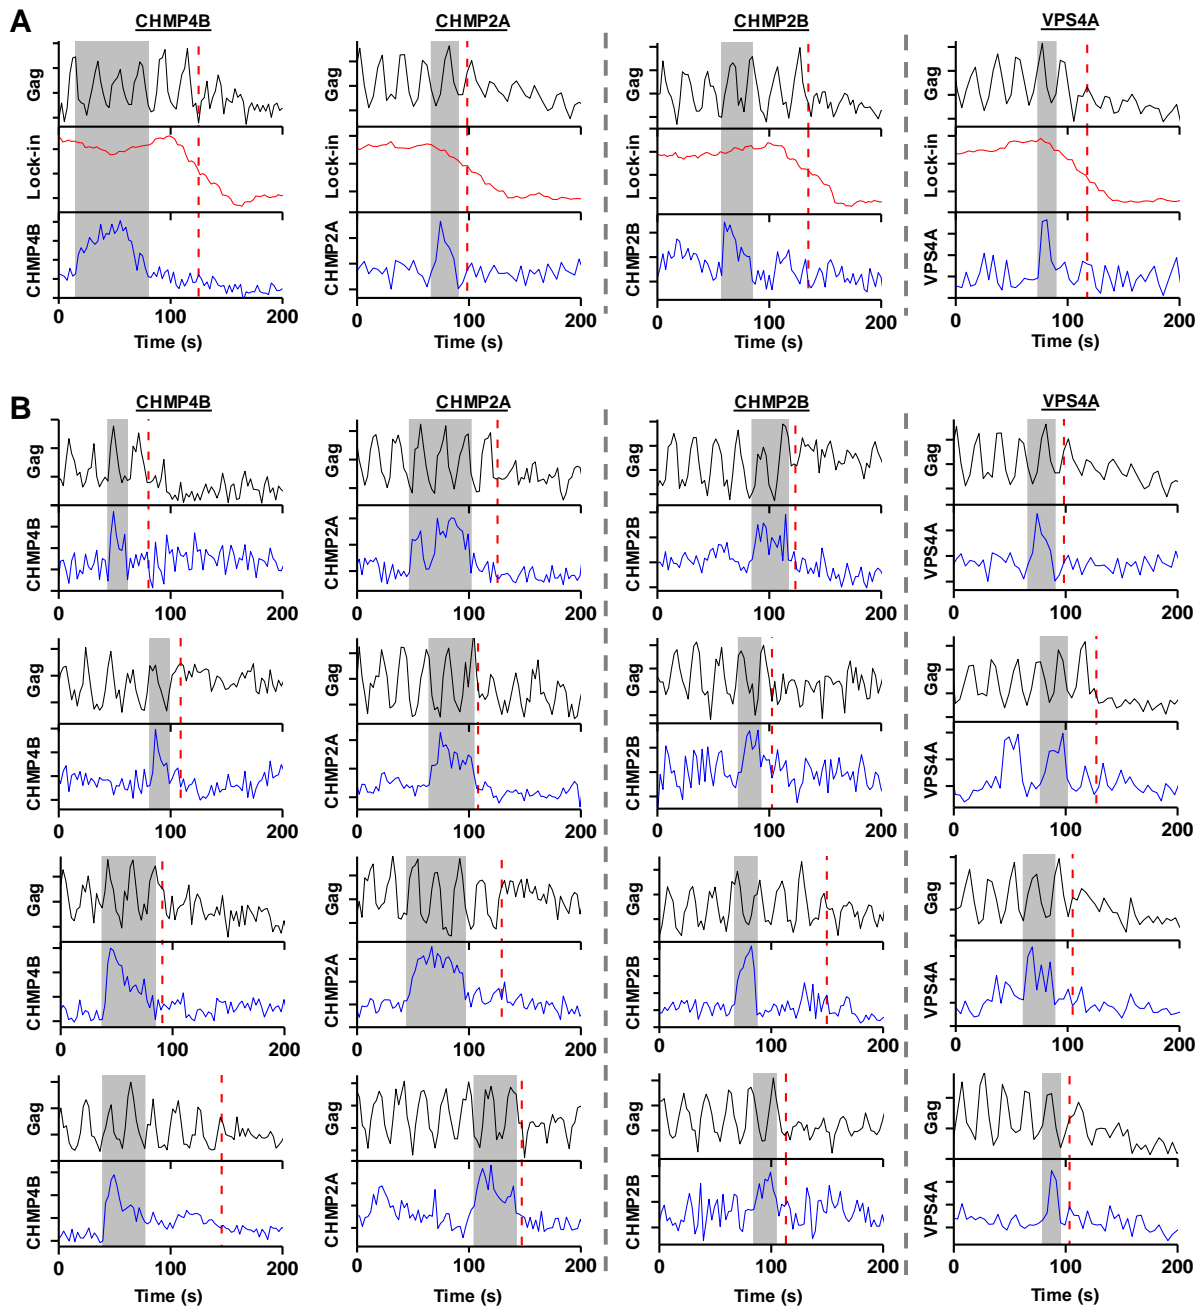

136

137 **Figure 1 – figure supplement 2.** Example traces of scission relative to recruitment of ESCRT-  
138 III or VPS4A. (A) Gag-pHluorin was observed as pCO<sub>2</sub> was cycled between 0% and 10% every  
139 10 s. VLP scission time (red dashed line) was characterized by half drop in lock-in signal.  
140 mCherry-CHMP4B, mCherry-CHMP2A, mCherry-CHMP2B and mCherry-VPS4A recruitment  
141 (left to right panels, recruitment highlighted in grey) were simultaneously monitored during Gag  
142 assembly. (B) Additional traces of VLP scission during recruitment of mCherry-CHMP4B,  
143 mCherry-CHMP2A, mCherry-CHMP2B, and mCherry-VPS4A (left to right columns).

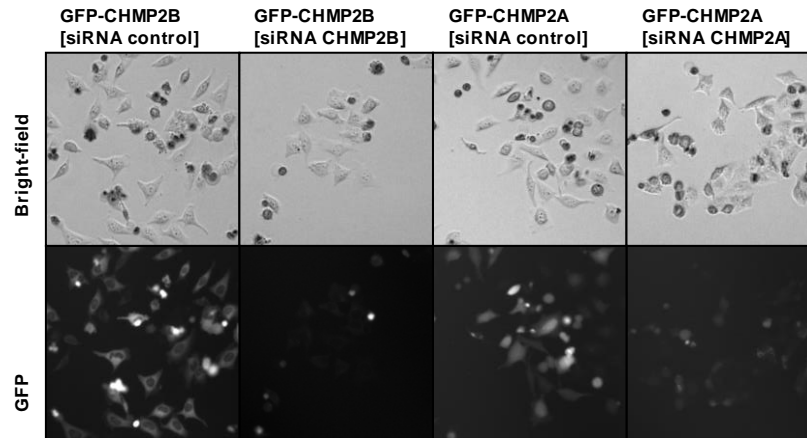

144

145 **Figure 1 – figure supplement 3.** Knockdown of CHMP2A or CHMP2B by siRNA. HeLa cell  
146 lines stably expressing either mEGFP-CHMP2A or mEGFP-CHMP2B were transfected with  
147 siRNA to either CHMP2A or CHMP2B or a control siRNA. 48 hours after transfection, presence  
148 of tagged ESCRT was significantly reduced and resulted in fewer cells, presumably because of  
149 decreased cell division.

150

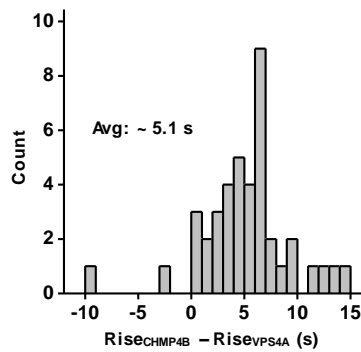

151

152 **Figure 1 – figure supplement 4.** CHMP4B was recruited prior to VPS4A. The times associated  
153 with the rising fluorescence edge of VPS4A and CHMP4B were compared relative to each other.  
154 CHMP4B appeared on average 5.1 s prior to VPS4A.

## 155 Acidification of cytosol accelerates scission

156 Our results indicate that the ESCRT-III and the ATPase VPS4 leave the membrane prior  
157 to scission. It is possible that the ESCRT-III play an essential role in tightening the membrane  
158 neck, but then need to be cleared away to allow for the opposing membranes to come closer for  
159 the scission reaction. The specific lipid composition in the neck is not known. However, both  
160 HIV-1 Gag and the ESCRT complexes are recruited to regions rich in phosphatidylinositol 4,5-  
161 bisphosphate (PIP<sub>2</sub>), which has four negative charges at pH 7 (Kooijman et al., 2009), with the  
162 net negative charge being the critical parameter for engaging ESCRTs (Lee et al., 2015). Thus,  
163 ESCRTs at the neck may bias the composition towards more negatively charged lipids  
164 (Chiaruttini et al., 2015). The pK<sub>a</sub> values for the two phosphate groups on the PI of PIP<sub>2</sub> are 6.5  
165 and 7.7 (van Paridon et al., 1986). Lowering the pH by raising the pCO<sub>2</sub> to 10% should  
166 protonate and thus reduce the charge of these negatively charged lipids thus reducing the  
167 repulsive force between the membranes. To test if scission was affected by the changes in  
168 cytosolic pH we switched the pCO<sub>2</sub> at a slower rate, every 120s (Figure 2). Scission was ~ 3X  
169 more likely when the cytoplasm was in the low pH state (10% pCO<sub>2</sub>) than the high pH state (0%  
170 pCO<sub>2</sub>) (Figure 2F) consistent with the idea that scission is more likely when the net negative  
171 charge on phospholipids in the viral neck is reduced by protonation.

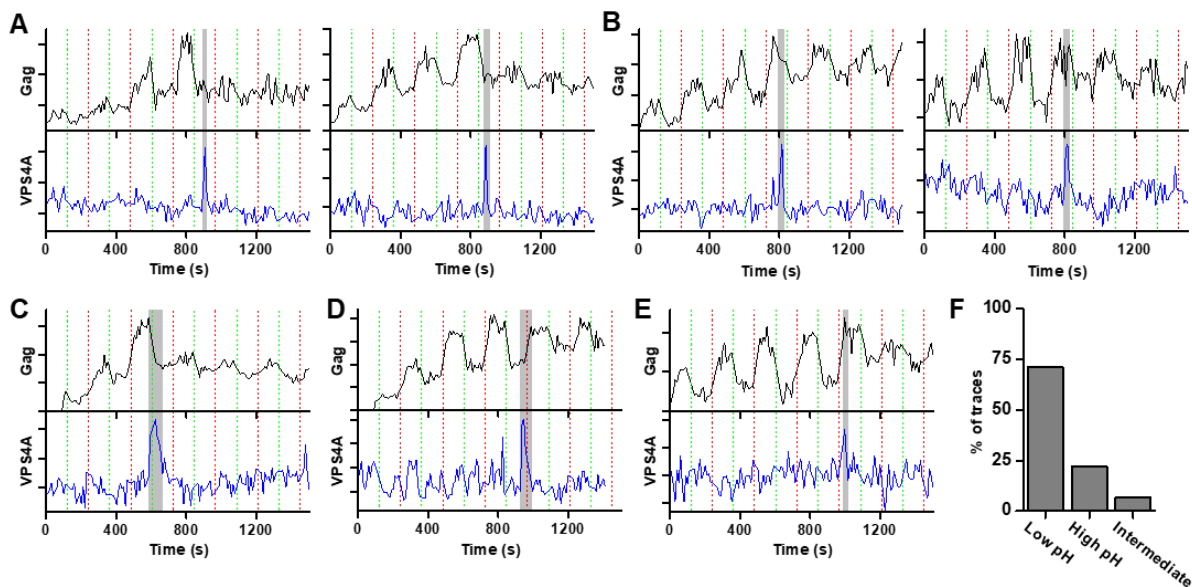

172 **Figure 2.** Scission more likely at lower cytoplasmic pH. (A) Example traces of Gag-pHluorin  
173 assembly while pCO<sub>2</sub> was switched every 120s between 0% (red dashed line, greater  
174 fluorescence emission) and 10% (green dashed line, lower fluorescence emission). In these traces  
175 the fluorescence intensity became fixed in the low pH state (10% pCO<sub>2</sub>) after reaching an  
176 assembly plateau. VPS4A appeared and disappeared during the first low pH state. (B) Examples  
177 in which fluorescence intensity became fixed in the high pH state (0% pCO<sub>2</sub>). VPS4A appeared  
178 and disappeared during the first trapped high pH state. (C) Example in which fluorescence  
179 became fixed in low pH state. VPS4A disappeared during the first trapped low pH state, but  
180 appeared during the previous high pH state. (D) Example in which fluorescence became fixed in  
181 high pH state. VPS4A disappeared during the first trapped high pH state, but appeared during the  
182 previous low pH state. (E) Example trace in which fluorescence intensity became fixed in a  
183 middle state. VPS4A disappeared near the time of transition. (F) Bar graph of cytoplasmic pH  
184 condition in which scission occurs (N=45). Scission is ~ 3-fold more likely at low pH (10%  
185



186 pCO<sub>2</sub>) compared to high pH (0% pCO<sub>2</sub>) condition. A small percentage of VLPs were trapped in  
187 an intermediate state.

### 188 Additional rounds of ESCRT-III/VPS4 recruitment occur following failed scission

189 Multiple rounds of ESCRT-III/VPS4 recruitment were previously observed following  
190 completion of Gag accumulation (Baumgartel et al., 2011; Jouvenet et al., 2011). It is possible  
191 the first wave of ESCRT-III/VPS4 led to productive scission and the subsequent rounds are  
192 inconsequential. Alternatively, the initial waves could be non-productive, perhaps a consequence  
193 of a failure to recruit both ESCRT-III and VPS4A concurrently, necessitating additional rounds.  
194 While simultaneously imaging Gag-pHluorin, CHMP4B and VPS4A, when there were multiple  
195 waves, both CHMP4B and VPS4 were recruited (Figure 3). Scission was only observed after the  
196 final wave of recruitment of ESCRT-III/VPS4 (Figure 3 B,C). Thus, not every cycle of arrival  
197 and then dispersal of ESCRT-III/VPS4 leads to subsequent scission. If scission does not occur,  
198 then a subsequent cycle of recruitment and dispersal of the ESCRT-III/VPS4 is required to  
199 complete the process. If the function of VPS4A is to recycle ESCRT-III after scission, then only  
200 a single wave would be expected since ESCRT-III would not be removed until after the single  
201 scission event has occurred.

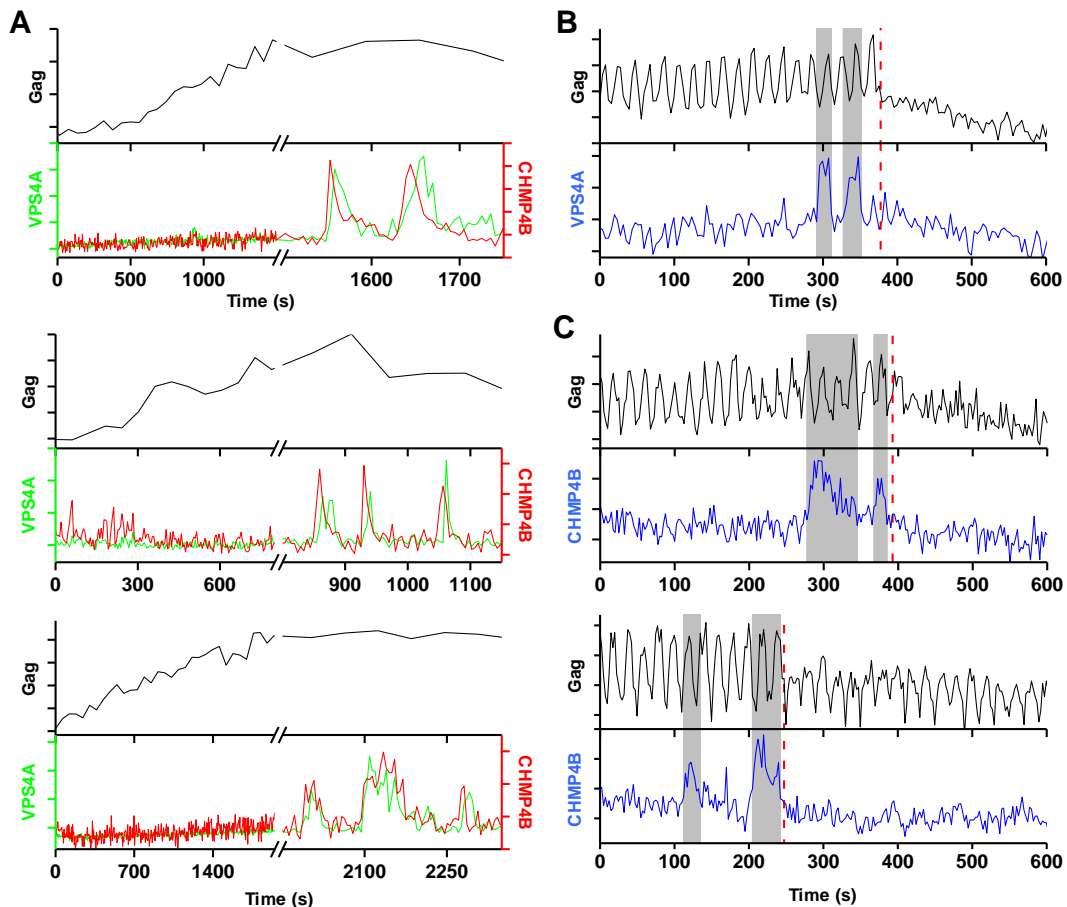

202  
203 **Figure 3.** A new round of ESCRT-III recruitment required following failed scission event. (A)  
204 Example trace of multiple waves of VPS4A and CHMP4B recruited following cessation of Gag  
205 accumulation. (B) Example trace of multiple recruitments of VPS4A prior to scission (red

206 dashed line). (C) Example traces of multiple recruitments of CHMP4B prior to scission (red  
207 dashed line).

### 208 **Membrane bending occurs throughout assembly of virus-like particle.**

209 Next, we set out to determine when membrane bending occurs relative to the assembly of  
210 Gag and recruitment of ESCRT-IIIs. We expressed a fluorescent protein (either EGFP or one of  
211 two circularly permuted superfolder variants, sf3 or sf11 (Pedelacq et al., 2006)) as a fusion to  
212 Gag (at the carboxyl terminus or in the matrix protein of Gag) to be able to follow membrane  
213 bending in live-cell imaging via changes in anisotropy of the GFP tag.

214 The orientation of the chromophore was characterized with a custom built polarized total  
215 internal reflection fluorescence (TIRF) illuminator (Johnson et al., 2014). During accumulation  
216 of Gag at VLPs, the emission of the GFP was quantified while excitation alternated with  
217 polarization perpendicular ( $\hat{\mathbf{p}}$  polarized) followed by parallel ( $\hat{\mathbf{s}}$  polarized) to the glass surface.  
218 Orientation was characterized by the ratio of emission intensities (P/S) and total Gag was  
219 monitored by P + 2S (Figure 4A and Figure 4 – supplement figure 1) (Anantharam et al., 2010).  
220 As Gag accumulated, the ratio of P/S dropped from  $\sim 2$  to  $\sim 1.4$ , with little variation ( $\pm 0.1$ )  
221 between the Gag-GFP versions (Figure 4B). The drop in P/S correlated with the increase in Gag  
222 as would be expected if the plasma membrane was bending during Gag assembly. The halfway  
223 decrease of P/S occurred prior to the halfway increase of the total Gag fluorescence (Figure 4C).  
224 Following Gag recruitment, as indicated by a plateau in Gag signal, there was no transition in  
225 P/S. This observation is inconsistent with the subsequent recruitment of the ESCRT-IIIs  
226 facilitating the transition from a flat lattice to a spherical particle.

### 227 **A simulation of spherical budding reproduced the time course of the P/S ratio relative to P** 228 **+ 2S**

229 In order to better understand the observed P/S ratio we formulated an expected P/S ratio  
230 for a spherical cap growing out of a flat membrane (Figure 4D). Briefly, we assumed the  
231 growing bud consisted of excitation dipoles uniformly distributed across the surface, with the  
232 dipoles oriented an angle  $\beta$  relative to the surface normal. A predicted P/S with respect to  $\beta$  and  
233 the normalized budded surface area (area from 0 to 1) was then found by integrating over all  
234 defined dipole orientations and the extent budded surface area.

235 More specifically, using coordinates described previously (Anantharam et al., 2010),  
236 position on the surface of the sphere was given in terms of a polar angle  $\theta$  and an azimuthal  
237 angle  $\phi$ , and the current extent budded was defined by  $\theta$  (Figure 4E). Thus, when  $\theta = 0^\circ$  there  
238 was no budding, when  $\theta = 90^\circ$  the sphere was half budded with dipoles from  $\theta = 0^\circ \rightarrow$   
239  $90^\circ$ , and when  $\theta = 180^\circ$  the sphere was fully budded with dipoles from  $\theta = 0^\circ \rightarrow 180^\circ$ .  
240 A uniform distribution of excitation dipoles was assumed on the bud (no dependence on  $\phi$  or  $\theta$ );  
241 however, at any given position these dipoles had an angular distribution that depended on the  
242 polar angle  $\beta$  relative to the surface normal:  $\rho(\beta)$ . For instance, if all dipoles were oriented at  
243  $\beta = 45^\circ$  then  $\rho(\beta) = \delta(\beta - 45^\circ)$  where  $\delta(x)$  is a delta function. The angular distribution  
244 was assumed to be uniform relative to the surface azimuthal angle  $\psi$  and the sphere was assumed  
245 to be smaller than the optical resolution of the microscope.

246

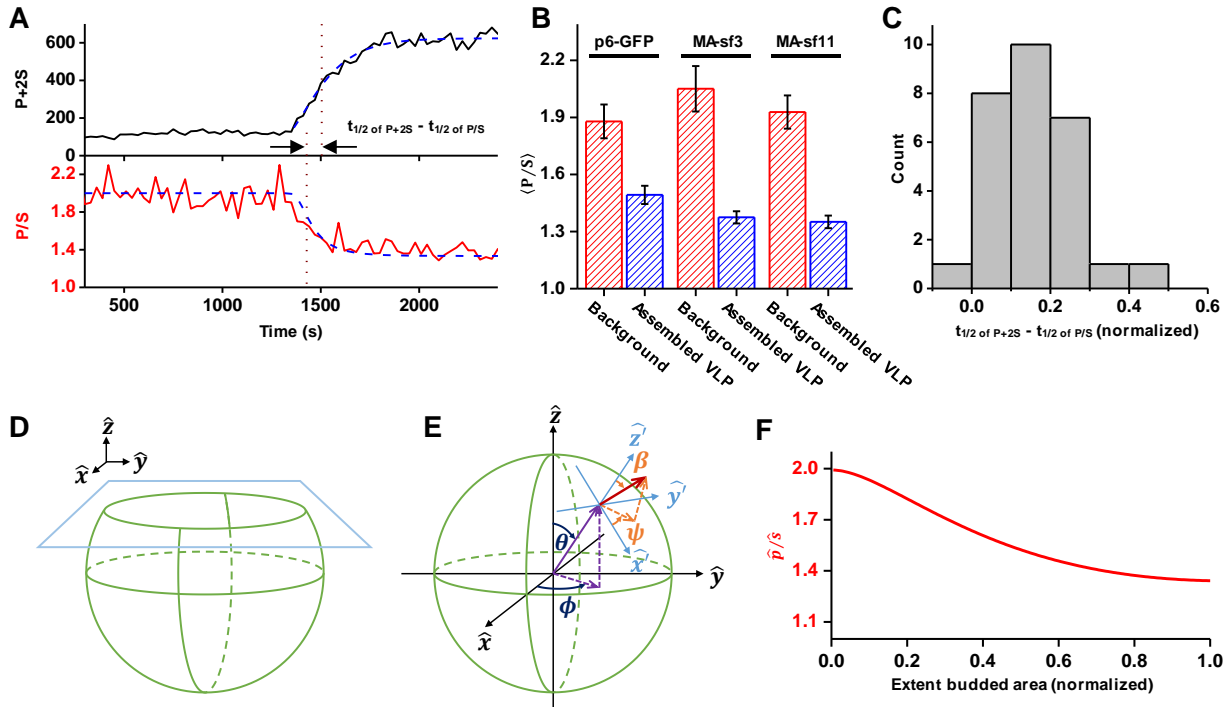

247  
 248 **Figure 4.** Structural changes in VLPs throughout Gag accumulation. **(A)** Example trace of Gag-  
 249 GFP (sf3 in Matrix of Gag) assembling into a single VLP. Images were collected every 30 s with  
 250 excitation illumination polarized either perpendicular ( $\hat{\mathbf{p}}$ ) or parallel ( $\hat{\mathbf{s}}$ ) to the glass surface.  
 251 Total Gag characterized by  $P + 2S$  (black line) and relative average dipole orientation by  $P/S$  (red  
 252 line).  $P + 2S$  was fit to an exponential and used to predict an expected  $P/S$  (blue dashed line)  
 253 assuming membrane bending throughout assembly. **(B)** Comparison of average  $P/S$  from all  
 254 traces before VLP assembly (membrane background) and after VLP assembly (plateau region)  
 255 for three different tagged versions of Gag. p6-GFP (N=8), MA-sf3 (N=9), and MA-sf11 (N=7).  
 256 Error bars represent s.d. **(C)** To compare the evolution of VLP structure to the assembly of Gag  
 257 the time for each assembly trace was normalized from 0 (beginning of Gag assembly) to 1 (end  
 258 of Gag assembly). A normalized time difference for each trace between Gag half assembly [ $\frac{1}{2}$   
 259 ( $P + 2S$ )<sub>max</sub>] and the dipole half drop [ $\frac{1}{2}$  ( $P/S$ )<sub>max</sub>] was found and all normalized differences  
 260 were compiled into histogram. **(D)** Illustration of sphere budding from flat membrane with extent  
 261 budded represented by  $\theta$ . **(E)** Illustration of coordinate system with  $\theta$  and  $\phi$  representing position  
 262 on the sphere and  $\beta$  and  $\psi$  representing orientation of excitation dipole. **(F)** Predicted  $P/S$  when  $\beta$   
 263 =  $45^\circ$ , background intensity is 45% of full assembly intensity, and evanescent field penetration  
 264 depth is the same as the radius of the VLP.  
 265

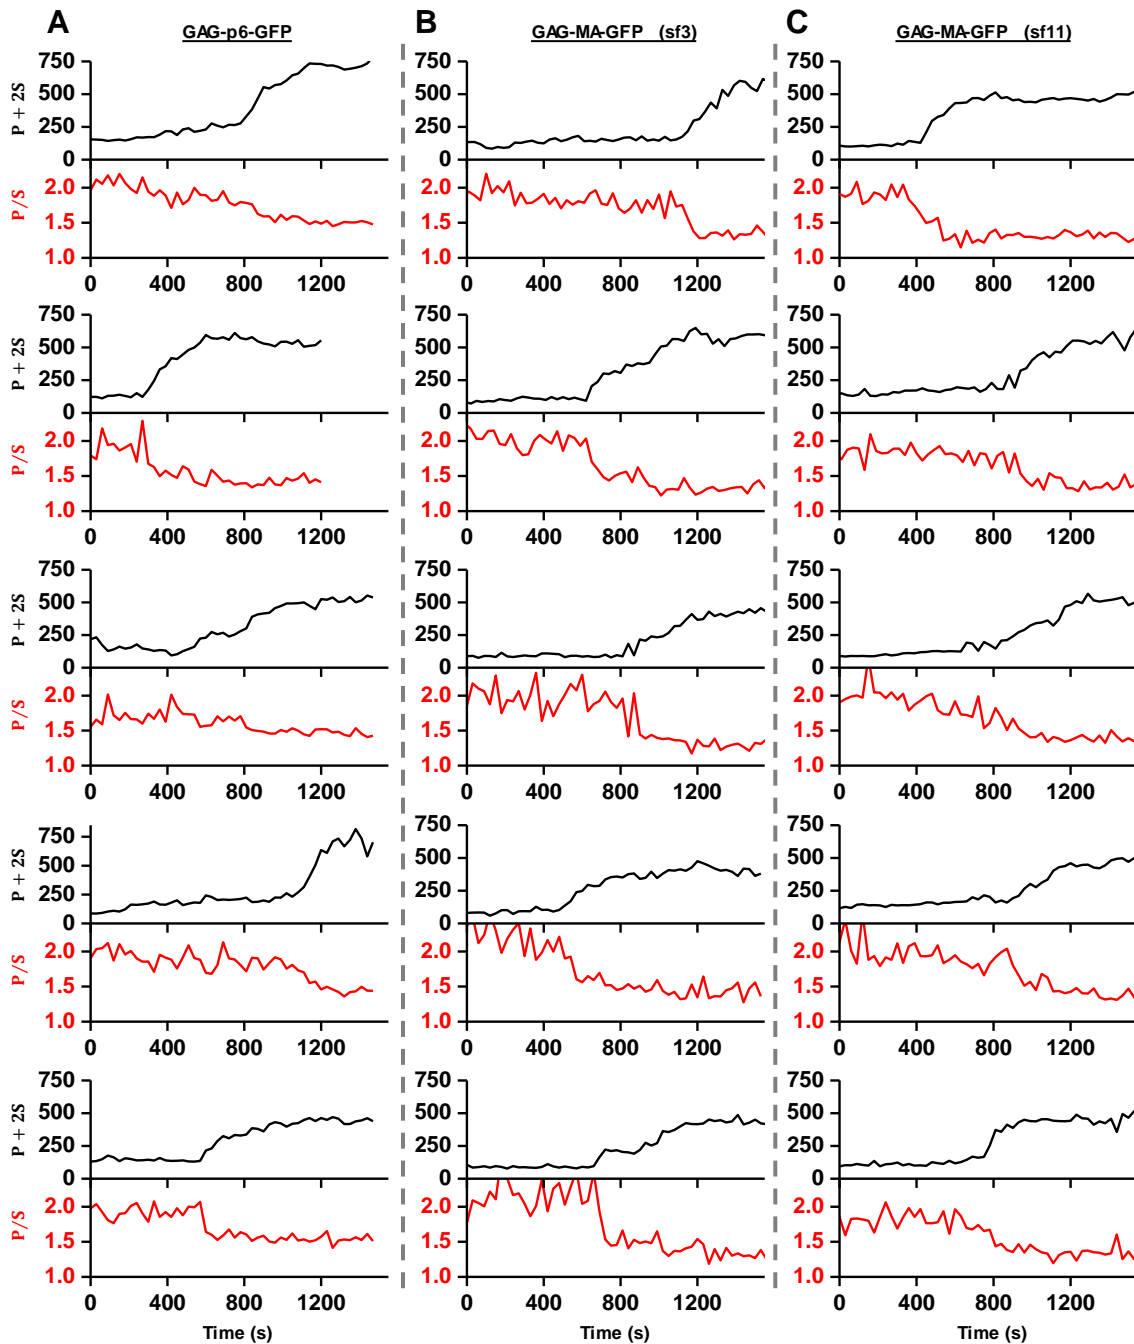

266

267

268 **Figure 4 – figure supplement 1.** Example traces of Gag accumulation (quantified as P + 2S)

269 and fluorophore polarization (quantified as P/S) during VLP assembly. Three different tagging

270 schemes were used: labeled with mEGFP after p6 domain at carboxy terminal of Gag (A),

271 labeled with circularly permuted GFP variant 3 in matrix of Gag (B), labeled with circularly

272 permuted GFP variant 11 in matrix of Gag (Pedelacq et al., 2006) (C).

273

274

274 A predicted P/S ( $\rho(\beta)$ ) relative to extent budded  $\theta$  was found by determining the  
 275 average component of the dipole excitation in  $\hat{y}$  (parallel to glass surface) and in  $\hat{z}$  (normal to  
 276 glass surface). Note: Experimentally due to azimuthal scanning we excited in both  $\hat{x}$  and  $\hat{y}$ , each  
 277 50% the time, but for simplicity in this analysis 100% excitation in  $\hat{y}$  was assumed since  $\hat{x}$  and  $\hat{y}$   
 278 are symmetric. The total collected fluorescence, S and P, in  $\hat{y}$  and  $\hat{z}$  were predicated by:

$$279 \quad S = \int_0^\theta \int_0^{2\pi} \int_0^\pi \int_0^{2\pi} Q_{\parallel} |E_{\hat{y}} \mu_{\hat{y}}|^2 \sin(\theta) \sin(\beta) d\psi d\beta d\phi d\theta \quad [1]$$

$$280 \quad P = \int_0^\theta \int_0^{2\pi} \int_0^\pi \int_0^{2\pi} Q_{\perp} |E_{\hat{z}} \mu_{\hat{z}}|^2 \sin(\theta) \sin(\beta) d\psi d\beta d\phi d\theta \quad [2]$$

281 where  $\mu_{\hat{y}}$  and  $\mu_{\hat{z}}$  are the components of the excitation dipole in  $\hat{y}$  and  $\hat{z}$  with respect to position on  
 282 the bud surface,  $E_{\hat{y}}$  and  $E_{\hat{z}}$  are the excitation electric field components in  $\hat{y}$  and  $\hat{z}$ , and  $Q_{\parallel}$  and  $Q_{\perp}$   
 283 are the light collection efficiencies of the microscope objective for dipoles parallel and  
 284 perpendicular to the glass surface. The excitation field intensity in  $\hat{y}$  and  $\hat{z}$  were assumed to be  
 285 the same, though this was an approximation since in reality  $\hat{p}$  had a small component of  $\hat{s}$  (Sund  
 286 et al., 1999). In addition, in TIR the excitation field decayed exponentially with distance from the  
 287 glass surface,  $E_{\hat{y} \text{ or } \hat{z}} = Ee^{-z/2d} = Ee^{-(1-\cos(\theta))/2d}$  where the characteristic decay constant  $d$   
 288 was defined in terms of a fraction of the radius of the VLP. The collection efficiency for  
 289 emission parallel  $Q_{\parallel}$  versus perpendicular  $Q_{\perp}$  were also assumed to be the same ( $Q_{\parallel} = Q_{\perp}$ ),  
 290 which was an approximation based on the use of a high numerical aperture objective  
 291 (Anantharam et al., 2010). From coordinate transforms described previously (Anantharam et al.,  
 292 2010; Sund et al., 1999) the components of the dipoles in  $\hat{y}$  and  $\hat{z}$  are given by:

$$293 \quad \mu_{\hat{y}} = \rho(\beta)[\cos(\theta) \sin(\phi) \sin(\beta) \cos(\psi) + \cos(\phi) \sin(\psi) \sin(\beta) + \sin(\theta) \sin(\phi) \cos(\beta)] \quad [3]$$

$$294 \quad \mu_{\hat{z}} = \rho(\beta)[- \sin(\theta) \sin(\beta) \cos(\psi) + \cos(\theta) \cos(\beta)] \quad [4]$$

295  $P/S_{VLP}(\theta, \rho(\beta))$  was solved computationally (Mathematica, Wolfram) with  $\theta$  parameterized in  
 296 terms of normalized surface area ( $A: 0 \rightarrow 1$ ) as  $\theta = \cos^{-1}(1 - 2A)$ . In addition, contribution  
 297 from fluorescence outside of the puncta was accounted for as follows:

$$298 \quad P/S(A, \rho(A), C_{\text{back}}) = \frac{A \cdot P/S_{VLP}(A, \rho(A)) + C_{\text{back}} \cdot P/S_{\text{Background}}}{A + C_{\text{back}}} \quad [5]$$

299 where  $C_{\text{back}}$  was the background intensity relative to final VLP intensity and  $P/S_{\text{Background}}$  was  
 300 the ratio of fluorescence when puncta  $A = 0$ , i.e.  $P/S_{\text{Background}} = P/S_{VLP}(0, \rho(0))$ .

301 We found an angle  $\beta = 45^\circ$ ,  $C_{\text{back}} = 0.45$ , and  $d = 1$  approximately replicated the observed  
 302 results (Figure 4A,F), reproducing the  $t_{1/2 \text{ of } P+2S} - t_{1/2 \text{ of } P/S}$  of 0.16 (normalized time) (Figure  
 303 4B). In Figure 4A an exponential fit to  $P + 2S$  was assumed in order to directly equate the VLP  
 304 area to the predicted P/S. Similar results were obtained by using a uniform distribution of dipoles  
 305 over an angular range, such as  $\beta$  between  $0^\circ$  to  $68.5^\circ$  or  $20^\circ$  to  $63.5^\circ$ . Thus, our  
 306 observation is consistent with formation of a spherical bud throughout the recruitment and  
 307 multimerization of Gag (Carlson et al., 2008; Woodward et al., 2015) which occurs many  
 308 minutes before recruitment of ESCRT-III.

315

## 316 Discussion

317 In retroviral assembly, the late domains of Gag are believed to indirectly recruit ESCRT-  
318 IIIs which then polymerize into ring or spiral structures at the bud neck to drive bending and  
319 scission of the neck membrane (Cashikar et al., 2014; Fabrikant et al., 2009; Hanson et al.,  
320 2008). However, our observations compel a new formulation of the role of ESCRTs in bending  
321 and scission. First, the initial bending of the membrane from a flat sheet to a spherical bud occurs  
322 during Gag assembly and prior to the arrival of ESCRT-IIIs. Thus, ESCRT-IIIs are not required  
323 to initiate curvature, a process which may be encouraged by Gag multimerization (Briggs et al.,  
324 2009; Wright et al., 2007). Second, the ESCRT-IIIs are only recruited after the accumulation of  
325 Gag is complete, indicating that Gag is not sufficient for recruitment. Third, the ESCRT-  
326 III/VPS4 are only recruited for tens of seconds and can no longer be detected at the moment of  
327 scission. While the ESCRTs and VPS4 cannot be detected in the tens of seconds prior to  
328 scission, it does not eliminate the possibility that a subpopulation of fewer than 20% of the  
329 ESCRT-III/VPS4, which are not detectable in the background fluctuations, stay around for a  
330 longer period of time (further discussed in Materials and Methods).

331 Factors beyond the late domains which might assist ESCRT-III recruitment include  
332 activation through ubiquitination or phosphorylation of Gag or one of the early ESCRTs, such as  
333 TSG101 which is co-recruited along with Gag (Bleck et al., 2014; Jouvenet et al., 2011).  
334 Additionally, ESCRT-III recruitment might be facilitated by high curvature in the neck or  
335 specific lipids recruited to these regions (Lee et al., 2015). The observation that the bulk of  
336 measured curvature of the nascent virion occurs prior to the recruitment of ESCRT-IIIs does not  
337 rule out any role for ESCRTs in membrane curvature. Indeed, the transient recruitment of  
338 ESCRT-IIIs may further constrict the neck linking the virion to the cell to prepare it for scission.  
339 The ESCRT-IIIs might facilitate scission by polymerizing into a spiral structure to constrict the  
340 neck ('polymerization constriction') (Cashikar et al., 2014; Wollert et al., 2009) or into a ring  
341 which when removed constricts the neck ('purse string constriction', Figure 5) (Saksena et al.,  
342 2009). The VPS4 may remove the ESCRT-IIIs potentially acting as a unfoldase (Yang et al.,  
343 2015). VPS4 may also remodel the ESCRT-IIIs throughout polymerization, potentially  
344 rearranging or tightening the structure (Cashikar et al., 2014). Remodeling is consistent with our  
345 observation that recruitment of VPS4 was virtually contemporaneous with the ESCRT-III, with a  
346 slight 5 s lag in HEK293T cells and 10 s in HeLa cells (Bleck et al., 2014).

347 We suggest that fission can only occur when the neck is narrow and after the ESCRT-IIIs  
348 are removed (Figure 5). What is driving the scission event if ESCRT-IIIs are gone? When the  
349 neck is sufficiently narrow (a few nm) fission may be a spontaneous event, possibly through a  
350 hemifission intermediate (Fabrikant et al., 2009; Kozlovsky and Kozlov, 2003). Narrowing of the  
351 neck by ESCRT-IIIs may allow additional Gag molecules adjacent to the neck to oligomerize,  
352 thereby keeping the constricted structure stable while the ESCRTs are displaced. However, cryo-  
353 EM images indicate a gap in the Gag lattice might be present at the site of the neck (Carlson et  
354 al., 2008). Alternatively, constriction might encourage exchange or modification of  
355 phospholipids with shapes and charges that help to retain a narrow neck following ESCRT-III  
356 disappearance. The ESCRT-III are dependent on phospholipids with negative charges. This  
357 could explain the greater than 3-fold increased scission rate at a lower pH (10% pCO<sub>2</sub>), which  
358 would raise the proton concentration to that of the PKa (6.5 and 7.7) (van Paridon et al., 1986),  
359 thereby reducing the surface charges (Figure 2F). If scission does not occur sufficiently soon

360 after removal of ESCRT-III, a new round of ESCRT-III recruitment and assembly is required to  
361 achieve scission (Figure 3).

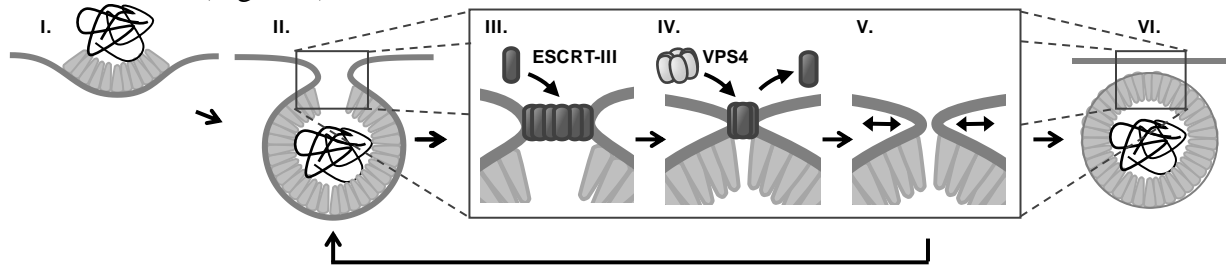

362

363 **Figure 5.** Proposed temporal model of ESCRT-III mediated scission of HIV from cell plasma  
364 membrane. (I) The viral particle structure changes throughout accumulation of Gag until (II) a  
365 spherical topology prevents incorporation of additional Gags. (III) ESCRT-IIIs (examples:  
366 CHMP2, CHMP4) are recruited to the neck and polymerize, with (IV) removal by VPS4  
367 resulting in constriction of the neck. (V) After removal of all ESCRT-IIIs the narrow neck  
368 undergoes spontaneous fission, (VI) freeing the virus. If membrane fission does not occur a new  
369 round of ESCRT-III recruitment is required (V→ II).

370

## 371 **Materials and Methods**

372 **Plasmid Construction.** Plasmids Gag-mEGFP, Gag-mTagBFP, pLNCX2-mEGFP-VPS4A and  
373 pLNCX2-mCherry-CHMP4B were described in Bleck et al. (Bleck et al., 2014) and the plasmids  
374 pCR3.1/Syn-Gag and pCR3.1/Syn-Gag-pHluorin were described in Jouvenet et al. (Jouvenet et  
375 al., 2008).

376 pLNCX2-mCherry-CHMP2A-siRNAs and pLNCX2-mCherry-CHMP2B-siRNAs  
377 were generated as follows. CHMP2A and CHMP2B were PCR amplified (Platinum PCR  
378 SuperMix, Thermo Fisher) from a cDNA library created from HEK293T cells (made via  
379 Invitrogen SuperScript III CellDirect kit #46-6320). PCR primers for CHMP2A (NM\_014453.3)  
380 were 5'-GCGCTCCGGACTCAGATCCCCGGAATTCATGGACCTATTGTTCCGGGCG-3' and  
381 5'-GCGCCTCGAGTCAGTCCCTCCGCAGGTTCT-3' and primers for CHMP2B  
382 (NM\_014043.3) were 5'-GCGCTCCGGACTCAGATCCCCGGAATTCATGGCGTCCCTCTT  
383 CAAGAA-3' and 5'-GCGCCTCGAGCTAATCTACTCCTAAAGCCT-3'. After PCR  
384 amplification, the fragments were digested with XhoI and BspEI (New England BioLabs,  
385 Ipswich, MA) and ligated into the plasmid pLNCX2-mCherry-CHMP4B (which was first  
386 digested with the same restriction enzymes to remove CHMP4B) using T4 DNA Ligase (New  
387 England BioLabs) yielding the plasmids pLNCX2-mCherry-CHMP2A and pLNCX2-mCherry-  
388 CHMP2B. Six silent coding mutations were then incorporated into these plasmids (QuickChange  
389 Lightning Site-Directed Mutagenesis Kit, Agilent, Santa Clara, CA) to make them insensitive to  
390 siRNA knockdown targeted at the cellular CHMP2A and CHMP2B RNA. The primers for the  
391 CHMP2A site-directed mutagenesis were  
392 5'-ACCTGGGACACCACAGCATCGCTTTCTTCTCCTCGTCCTCCTCATCACCCATGGCATC-  
393 3' and 5'-GATGCCATGGGTGATGAGGAGGACGAGGAAGAAAGCGATGCTGTGGTGTGTC  
394 CCAGGT-3' and for CHMP2B were 5'-AACCGTGGATGATGTAATAAAGGAGCAAAACC  
395 GTGAATTACGAGGTACACAGAGGGCTAT-3' and 5'-ATAGCCCTCTGTGTACCTCGTA  
396 ATTCACGGTTTTGCTCCTTTATTACATCATCCACGGTT-3'. The siRNA  
397 sequence for CHMP2A knockdown was 5'-rArArGrArUrGrArArGrGrArGrArGrUrGrAdT

398 dT-3' (begins at position 464 in NM\_014453.2) and for CHMP2B was 5'-rGrGrArArCrArGrAr  
399 ArUrCrGrArGrArGrUrUrAdTdT-3' (begins at position 45 in NM\_014043.3) (Morita et al.,  
400 2011). All ssDNA and ssRNA oligos were purchased from Integrated DNA Technologies  
401 (Coralville, IA) and manufacturers' protocols were used for all preparations.

402 pLNCX2-mEGFP-CHMP2A and pLNCX2-mEGFP-CHMP2B were generated by  
403 replacing mCherry in pLNCX-mCherry-CHMP2A and pLNCX-mCherry-CHMP2B with  
404 monomeric variant (A206K) of mEGFP from pEGFP-N1 (Clontech/Takara Bio USA, Mountain  
405 View, CA). Restriction enzymes AgeI and BspEI (New England BioLabs) were used to digest  
406 the backbone and fragments, and these fragments were then ligated into the backbones with T4  
407 DNA ligase. The clonal HeLa cell lines were generated from these plasmids using a previously  
408 described protocol (Bleck et al., 2014). pLNCX2-mCherry-VPS4A was generated by replacing  
409 mEGFP in pLNCX2-mCherry-VPS4A (Bleck et al., 2014) with  
410 mCherry. mCherry was PCR amplified from pmCherry-N1 (Clontech) using In-Fusion  
411 recombination primers 5'-CTCTAGCGCTACCGGTGCGCCACCATGGTGAGCAAGGGC-3'  
412 and 5'-CTCTAGCGCTACCGGTGCGCCACCATGGTGAGCAAGGGC-3'. pLNCX2-mEGFP-  
413 VPS4A was digested with AgeI and BspEI and the fragment containing VPS4A was gel purified  
414 (Thermo Fisher PureLink Quick Gel Extraction Kit). The PCR product was then inserted into  
415 purified backbone using In-Fusion HD Cloning Kit (Clontech) according to manufacturer's  
416 instructions.

417 Gag-MA-sf3 and Gag-MA-sf11 were generated by inserting the circularly permuted  
418 superfolder GFPs (provided by Jeffrey Waldo lab) (Pedelacq et al., 2006) into a variant of  
419 pCR3.1/Syn-Gag that has an EcoRV  
420 restriction enzyme site near the carboxy terminal of MA (Asn-Gln-Val-Ser  
421 modified to Asn-Gln-**Asp-Ile**-Val-Ser). Circularly permuted version 3 was PCR amplified with  
422 recombination In-Fusion primers 5'-CACAGCAACCAGGATGGCAGCAGCCATCATCATC-  
423 3' and 5'-GTTCTGGCTGACGATGGTACCCTCCAGTAGTGCAAATAA-3'. The primers for  
424 circularly permuted version 11 were 5'-CACAGCAACCAGGATGGCAGCAGCCATCATCAT  
425 C-3' and 5'-GTTCTGGCTGACGATGGTACCCTCTTCAATGTTGTGG-3'. After digesting  
426 pCR3.1/Syn-Gag-EcoRV with EcoRV (New England BioLabs) the In-Fusion HD kit was used to  
427 insert PCR fragments into the Syn-Gag backbone.

428 **Sample Preparation.** With the exception of 120 s pCO<sub>2</sub> switching data, all imaging was  
429 conducted in HEK293T cells grown in DMEM (#11965, Thermo Fisher Scientific, Waltham,  
430 MA) with 10% FBS (#F4135, MilliporeSigma, St. Louis, MO). HEK293T cells were gift from P.  
431 Bianiaz Laboratory and were not been authenticated or tested for mycoplasma contamination.  
432 120 s pCO<sub>2</sub> switching experiments imaged in HeLa cells which were grown in the same growth  
433 medium. HeLa cells were from ATCC and were not authenticated or tested for mycoplasma  
434 contamination. For polarization excitation experiments cells were grown on 35 mm glass bottom  
435 dishes (#P35G-1.0-20-C, MatTek, Ashland, MA) coated with fibronectin (#33010, Thermo  
436 Fisher) by incubating the dish with 10 µg/ml fibronectin in PBS for 1 hour. For pCO<sub>2</sub> switching  
437 experiments perfusion slides (#80186 µ-Slide, Ibidi, Martinsried, Germany) were incubated with  
438 60 µg/ml fibronectin in PBS for 1 hour before plating cells. For all experiments cells at ~75%  
439 confluency were transfected with expression plasmids ~3.5 hours prior to beginning to image.  
440 For transfection 8 µl of Lipofectamine2000 (#11668, Thermo Fisher) was incubated for 5 min in  
441 250 µl of Opti-MEM I (#31985, Thermo Fisher) and 2000 µg of DNA was incubated for 5 min  
442 in 250 µl of Opti-MEM I. Both solutions were then mixed and incubated for 20 minutes before



443 adding to adhered cells on MatTek dish in 2000  $\mu$ l of DMEM. The same procedure was used for  
444 cells in the flow slide, but the transfection mixture was added to 2000  $\mu$ l of DMEM and then  
445 1000  $\mu$ l was perfused through the chamber. At least four cells were used for each experimental  
446 condition in order to account for potential variability between cells. Both CHMP2A and  
447 CHMP2B were knocked down with siRNA for mCherry-CHMP2A and mCherry-CHMP2B  
448 experiments. siRNA transfections were conducted 48 hours prior to DNA plasmid transfection  
449 using Lipofectamine RNAiMAX (following manufacturer's instructions; #13778, Thermo  
450 Fisher). A second round of siRNA transfection was performed at the time of DNA transfection.  
451 The following DNA ratios were used for transfections: Gag:Gag-mEGFP (4:1), Gag:Gag-MA-  
452 sf3 (4:1), Gag:Gag-MA-sf3 (4:1), Gag:Gag-pHluorin:mCherry-VPS4A (12:3:5), Gag:Gag-  
453 pHluorin:mCherry-CHMP4B (12:3:5), Gag:Gag-pHluorin:mCherry-CHMP2A-siRNAs  
454 (4:1:5), Gag:Gag-pHluorin:mCherry-CHMP2B-siRNAs (4:1:5), Gag:Gag-TagBFP:mEGFP-  
455 VPS4A:mCherry-CHMP4B (24:6:5:5). Note: The Gag to tagged Gag ratio was 4:1 in all  
456 experiments.

457 **CO<sub>2</sub> modulation system.** Gas from compressed cylinders was bubbled into two imaging media  
458 reservoirs (140 ml open piston Monoject syringe, Medtronic, Minneapolis, MN) partially filled  
459 with cell imaging media (10 mM HEPES, 9.7 g/L of Hanks BBS (MilliporeSigma), and NaOH to  
460 adjust the pH to 7.4) with 1% FBS. One reservoir was equilibrated with compressed air (labeled  
461 0% in these experiments but actually contained 0.04% CO<sub>2</sub>), and the other reservoir was  
462 equilibrated with 10% CO<sub>2</sub> (balanced with air) (Figure 1 – figure supplement 1). The reservoirs  
463 were mounted to a flow perfusion system (ValveBank II, AutoMate Scientific, Berkeley, CA)  
464 which enabled automated selection of desired media via solenoid valves under the reservoirs.  
465 Tygon tubes (R-3603) from each valve carried the media to a fluid combiner just prior to the  
466 perfusion slide chamber containing adhered cells. After the flow chamber a single tube carried  
467 the discharge media to a collection container. This container was placed below the height of  
468 equilibration reservoirs so that fluid flow was driven by gravity. The flow rate (~ 3 ml/min) was  
469 controlled with a clamp regulator attached to the discharge tube. At this flow rate the response  
470 time of the fluorophores to a pCO<sub>2</sub> change, characterized in terms of an exponential decay  
471 constant, was ~ 7 s. A peristaltic pump (MS-Reglo, Ismatec/Cole-Parmer, Wertheim, Germany)  
472 then passed the media from the collection reservoir back to the equilibration reservoirs so that  
473 the media could be recycled. The microscope and entire imaging media flow system were  
474 enclosed in a temperature control box held at 37°C. Valve regulation, camera trigger and laser  
475 excitation were all controlled via custom software written in LabView (National Instruments,  
476 Austin, TX).

477 **Imaging with pCO<sub>2</sub> switching.** For experiments with pCO<sub>2</sub> switching every 10 s the media was  
478 continuously flowed through the imaging chamber, with the reservoir supplying the media being  
479 switched every 10 s. Two images were collected every 2.5 s (4.0 s for CHMP4B experiments)  
480 with 488nm excitation for pHluorin (100 ms exposure with power between 1-5 mW), followed  
481 by 594 nm excitation for mCherry (100 ms exposure with laser power between 5-20 mW;  
482 100mW DPSS laser, Cobolt, Solna, Sweden). A multipass emission filter (zet405/488/594m,  
483 Chroma Technology, Bellows Falls, VT) enabled rapid sequential wavelength imaging. For  
484 experiments with pCO<sub>2</sub> switching every 120 s the desired media was only applied to the chamber  
485 for 10s, followed by no flow for 110 s. During this time sequential 488 nm (100 ms, 1 mW) and  
486 594 nm (100 ms, 1 mW) excitation images were captured every 10 s. All experiments were  
487 conducted with 100 Hz azimuthal scanning TIR-FM illumination.

488 **Temporal determination of scission.** The cytosolic pH was oscillated by switching the pCO<sub>2</sub>  
489 from 0% to 10% (for an average of 5%) every 10 seconds or every 120 s. The cytosolic carbonic  
490 anhydrase ensures that the pH in the cytosol closely tracks the pCO<sub>2</sub> (Simon et al., 1994). At  
491 scission the luminal pH of the VLP or virion is no longer continuous with the cytosol and no  
492 longer tracks the cytosolic pH. Individual VLPs were identified from the Gag-pHluorin images  
493 using Metamorph (version 7.8.10, Molecular Devices, Sunnyvale, CA) and the peak pixel  
494 amplitude in a 15 pixel (975 nm) diameter regions of interests centered on individual VLPs was  
495 found for all frames (Figure 1, Figure 1 – figure supplement 2).

496 For switching every 10 s we used a custom LabView software lock-in amplifier to find changes  
497 in VLP sensitivity to pCO<sub>2</sub> modulation. The data were high-pass filtered (2-pole Butterworth  
498 with 0.01 Hz cutoff) to bias the pCO<sub>2</sub> dependent pHluorin intensity fluctuations (with a period of  
499 20s) around 0. This signal was then multiplied by an in-phase sine wave with the same period  
500 and a moving average was calculated over a period of 60 s. A significant change in signal  
501 indicated a change in sensitivity to pCO<sub>2</sub> modulation. At many of the identified VLPs a clear  
502 transition from a high plateau to a low plateau in the lock-in signal was observed (Figure 1 –  
503 figure supplement 2). The moment of scission was classified as the halfway amplitude between  
504 the two plateaus, with half of the moving window containing pre-scission data and the other half  
505 containing post-scission data (Figure 1 – figure supplement 2A). In the same regions of interest  
506 the average mCherry signal (tagged to VPS4A, CHMP4B, CHMP2A, or CHMP2B) was  
507 analyzed and peaks were identified in which there was a clear increase followed by decrease in  
508 fluorescence intensity (Figure 1A,C,E,G and Figure 1 – figure supplement 2). The appearance  
509 time was identified when a signal was first observed above cellular background, and the  
510 disappearance time when the signal dropped to cellular background. Appearance and  
511 disappearance relative to scission were then found by comparing these times to the scission time  
512 (Figure 1B,D,F,H). Based on the observed distribution of appearance and disappearance times  
513 relative to scission, with an average of roughly a minute, we excluded data in which scission and  
514 ESCRT-III/VPS4A recruitment were more than four minutes apart. Excluded data was attribute  
515 to a failed or uncorrelated scission event. ~25 traces under each condition were collected to gain  
516 understanding of the distribution of events.

517 The average signal-to-noise was approximately 7:1 (peak signal:S.D.) across all ESCRT-  
518 III/VPS4A measurements, and ESCRT-III/VPS4A recruitment was estimated to be detectable  
519 when the sustained signal deviated from the mean by ~1-2 standard deviations. Based on this  
520 deviation it is estimated that ESCRT-III/VPS4A recruitment below ~20% of peak recruitment  
521 would be undetected. We estimate that there are between 10-100 ESCRTs in a complex at peak  
522 signal, with the possibility of < 10 ESCRTs undetectable in the background noise. Assuming a  
523 peak signal (100 ESCRTs) decreases exponentially into the noise after 10s (10 ESCRTs), we  
524 estimate only ~1 ESCRTs would remain after another 10s. This time is comparable to the ~20s  
525 measured between peak disappearance and scission. If the disappearance is faster than  
526 exponential, e.g. linear, the ESCRTs will be gone even sooner. This interpolation of ESCRT-IIIs  
527 or VPS4A disappearance profiles into the noise indicates the ESCRTs predominantly leave the  
528 budding site prior to scission (Figure 1 – figure supplement 2). For a significant number (> 1) of  
529 either ESCRT-IIIs or VPS4A to be around following scission there would need to be a second,  
530 smaller population that follows much slower disappearance kinetics.

531 For pCO<sub>2</sub> switching every 120 s for each tracing we determined the first transition of  
532 pCO<sub>2</sub> for which the fluorescence had decreased sensitivity, indicating protons were no long

533 freely flowing between cytosol and lumen of the VLP. We assumed that scission must have  
534 occurred during the previous plateau of pCO<sub>2</sub> (Figure 2A-E). For example, if scission occurred  
535 during the 10% pCO<sub>2</sub> cycle (low fluorescence) then after the next transition to 0% pCO<sub>2</sub>, and all  
536 subsequent transitions, the fluorescence would be closer to that of the 10% (low fluorescence  
537 state than the 0% pCO<sub>2</sub> (high fluorescence) state. Conversely, if scission occurred during the 0%  
538 (high fluorescence), future 10% pCO<sub>2</sub> plateaus would be closer to the high fluorescence state.  
539 Occasionally traces appeared to be trapped in an intermediate pH state, which we attribute to  
540 scission occurring during the transition between pCO<sub>2</sub> states. Individual VLP traces were  
541 categorized into being trapped in a high, middle or low pH state by comparing the Gag-pHLuorin  
542 signal before and after the VLP became insensitive to pCO<sub>2</sub> switching (Figure 2F).

543 **Simultaneous VPS4A and CHMP4B imaging.** Gag-mTagBFP, mEGFP-VPS4A and mCherry-  
544 CHMP4B were imaged in TIRFM with sequential illumination of 594 nm (100ms, 10-20 mW),  
545 488 nm (100ms, 4-10mW) and 405 nm (100ms, 2-4mW; 120 mW LuxX diode laser, Omicron).  
546 mEGFP-VPS4A and mCherry-CHMP4B images were acquired every 5 s and Gag-TagBFP  
547 images were acquired every 60 s. VPS4A and CHMP4B relative appearance time were  
548 conducted using the same method as described previously (Figure 1 – figure supplement 4)  
549 (Bleck et al., 2014).

550 **mEGFP-CHMP2A/B knockdown imaging.** HeLa cell lines stably expressing either mEGFP-  
551 CHMP2A or mEGFP-CHMP2B and transfected with the respective siRNA (48hrs in advance)  
552 were imaged on an inverted microscope (IX-70, Olympus, Shinjuku, Japan) with epi-  
553 illumination via a Xenon lamp and transmitted bright-field illumination (Figure 1 – figure  
554 supplement 3).

555 **Polarized excitation imaging.** Images were collected on an inverted microscope (IX-81,  
556 Olympus) with a custom built through-the-objective (100X UAPON 1.49 NA, Olympus)  
557 polarized TIRFM illuminator (Johnson et al., 2014). Throughout imaging the excitation TIR light  
558 was azimuthally scanned at 200 Hz with mirror galvanometers (Nutfield Technology, Hudson,  
559 NH) in order to reduce spatial illumination nonuniformities. A multiband polychroic  
560 (zt405/488/594/647rpc 2mm substrate, Chroma) was positioned between the galvanometers and  
561 objective in order to isolate the excitation light from the emitted light. Light from a 488nm laser  
562 (100 mW LuxX diode laser, Omicron, Rodgau-Dudenhofen, Germany) was modulated between  
563 being polarized perpendicular ( $\hat{p}$ ) or parallel ( $\hat{s}$ ) to the glass surface by passing the light through  
564 an EOM (Conoptics, Danbury, CT) and quarter-wave plate prior to the galvanometer scan-head.  
565 The polarization generated by the EOM was modulated in sync with the galvanometers such that  
566 during scanning a  $\hat{p}$  or  $\hat{s}$  state was maintained at all azimuthal positions. The scanning polar  
567 angle was selected such that the excitation light was just beyond the TIR critical angle,  
568 minimizing  $\hat{s}$  polarized light contaminating  $\hat{p}$  excitation (Johnson et al., 2014).

569 A combined  $\hat{p}/\hat{s}$  ratio image was collected every 30s. To generate this ratio image a  
570 sequential series of 10  $\hat{p}$  and  $\hat{s}$  images were collected, divided (after subtracting camera offset),  
571 and then averaged. Each  $\hat{p}$  or  $\hat{s}$  image had an exposure of 5 ms (laser power between 25-50mW),  
572 with a new image collected every 15 ms. Thus, in 30 ms a single  $\hat{p}/\hat{s}$  image was generated, and  
573 then 10 of these images (over a 300 ms duration) were averaged (ImageJ) (Schneider et al., 2012)  
574 to create the combined ratio image. The short period was utilized in order to minimize artifacts in  
575 the  $\hat{p}/\hat{s}$  ratio image from VLP or cell movement. The galvanometers, EOM, camera shutter, and  
576 laser shutters were all driven/triggered by a multifunction data acquisition board (PCIe-6323,  
577 National Instruments) and controlled from custom written software in LabView. Images were

578 streamed from a CMOS camera (Flash-4.0, Hamamatsu, Hamamatsu City, Japan) to a  
579 workstation (T7500, Dell, Round Rock, TX) running image acquisition software (Metamorph).  
580 A single band emission filter (ET525/50m, Chroma) was used to isolate fluorophore emission. In  
581 order to characterize the amount of Gag in an assembling VLP, an average  $\hat{\mathbf{p}} + 2 \cdot \hat{\mathbf{s}}$  image was  
582 also generated at each time point.

583 **Polarization Analysis.** Puncta were found in the  $\hat{\mathbf{p}} + 2 \cdot \hat{\mathbf{s}}$  images which increased and then  
584 plateaued in amplitude. These puncta were then selected for orientation analysis with  $\hat{\mathbf{p}}/\hat{\mathbf{s}}$ . A 2D  
585 Gaussian was fit to these assembling puncta to find a frame by frame subpixel peak location.  
586 Using bilinear interpolation the  $\hat{\mathbf{p}}/\hat{\mathbf{s}}$  and  $\hat{\mathbf{p}} + 2 \cdot \hat{\mathbf{s}}$  images were resampled 10X in the horizontal  
587 and vertical directions (65 nm to 6.5 nm wide pixels). On these resampled images P/S and P + 2S  
588 values were found by averaging the resampled pixel intensities that are within 100nm of the peak  
589 fit locations (Figure 4A, Figure 4 – figure supplement 1). For frames prior to the appearance of a  
590 puncta P/S and P + 2S values were determined using the fit location of the first frame in which  
591 there was a puncta fit. For each tagged version of Gag the average P/S value for background and  
592 assembled VLPs was calculated by finding an average P/S for each trace before assembly and  
593 after a plateau was reached, and then averaging across all traces (Figure 4B). A relative time to  
594 half growth for each VLP was determined by finding the halfway to assembly point (i.e. the  
595 point where the intensity is halfway between the intensity at assembly beginning and plateau)  
596 and then finding the normalized time at this point relative to the time assembly began and  
597 appeared to reach a plateau. This normalized time was between 0 and 1. A normalized time to  
598 half drop in P/S was also found (normalized to the same time scale) and these values were  
599 subtracted to find:  $t_{1/2 \text{ of } P+2S} - t_{1/2 \text{ of } P/S}$  (normalized). All fluorophore combinations were  
600 included in the P/S histogram (Figure 4C) since all combinations had similar P/S characteristics.

## 601 **Acknowledgements**

602 We thank M. Will and M. A. Lockard for assisting with plasmid preparations. We also thank M.  
603 S. Itano, M. D. Tomasini, K. Bredbenner and P. Bieniasz for discussion during manuscript  
604 preparation. This work was supported by NIH grants 1P50GM103297 and R01 GM11958 to  
605 S.M.S.

## 606 **Author Contributions**

607 D.S.J., M.B., and S.M.S. designed experiments. D.S.J. and M.B. prepared samples. D.S.J.  
608 collected and analyzed data. D.S.J., M.B., and S.M.S. wrote manuscript.

609 **Competing interests:** The authors declare that no competing interests exist.

610

## 611 References

- 612
- 613 Anantharam, A., B. Onoa, R.H. Edwards, R.W. Holz, and D. Axelrod. 2010. Localized topological changes of the  
614 plasma membrane upon exocytosis visualized by polarized TIRFM. *The Journal of cell biology*. 188:415-  
615 428.
- 616 Babst, M., D.J. Katzmann, E.J. Estepa-Sabal, T. Meerloo, and S.D. Emr. 2002a. Escrt-III: an endosome-associated  
617 heterooligomeric protein complex required for mvb sorting. *Developmental cell*. 3:271-282.
- 618 Babst, M., D.J. Katzmann, W.B. Snyder, B. Wendland, and S.D. Emr. 2002b. Endosome-associated complex,  
619 ESCRT-II, recruits transport machinery for protein sorting at the multivesicular body. *Developmental cell*.  
620 3:283-289.
- 621 Baumgartel, V., S. Ivanchenko, A. Dupont, M. Sergeev, P.W. Wiseman, H.G. Krausslich, C. Brauchle, B. Muller,  
622 and D.C. Lamb. 2011. Live-cell visualization of dynamics of HIV budding site interactions with an ESCRT  
623 component. *Nature cell biology*. 13:469-474.
- 624 Bleck, M., M.S. Itano, D.S. Johnson, V.K. Thomas, A.J. North, P.D. Bieniasz, and S.M. Simon. 2014. Temporal and  
625 spatial organization of ESCRT protein recruitment during HIV-1 budding. *Proceedings of the National  
626 Academy of Sciences*. 111:12211-12216.
- 627 Briggs, J.A., J.D. Riches, B. Glass, V. Bartonova, G. Zanetti, and H.G. Krausslich. 2009. Structure and assembly of  
628 immature HIV. *Proceedings of the National Academy of Sciences of the United States of America*.  
629 106:11090-11095.
- 630 Carlson, L.A., J.A. Briggs, B. Glass, J.D. Riches, M.N. Simon, M.C. Johnson, B. Muller, K. Grunewald, and H.G.  
631 Krausslich. 2008. Three-dimensional analysis of budding sites and released virus suggests a revised model  
632 for HIV-1 morphogenesis. *Cell host & microbe*. 4:592-599.
- 633 Cashikar, A.G., S. Shim, R. Roth, M.R. Maldazys, J.E. Heuser, and P.I. Hanson. 2014. Structure of cellular ESCRT-  
634 III spirals and their relationship to HIV budding. *eLife*. 3.
- 635 Chiaruttini, N., L. Redondo-Morata, A. Colom, F. Humbert, M. Lenz, S. Scheuring, and A. Roux. 2015. Relaxation  
636 of Loaded ESCRT-III Spiral Springs Drives Membrane Deformation. *Cell*. 163:866-879.
- 637 Dobro, M.J., R.Y. Samson, Z. Yu, J. McCullough, H.J. Ding, P.L. Chong, S.D. Bell, and G.J. Jensen. 2013. Electron  
638 cryotomography of ESCRT assemblies and dividing *Sulfolobus* cells suggests that spiraling filaments are  
639 involved in membrane scission. *Molecular biology of the cell*. 24:2319-2327.
- 640 Fabrikant, G., S. Lata, J.D. Riches, J.A. Briggs, W. Weissenhorn, and M.M. Kozlov. 2009. Computational model of  
641 membrane fission catalyzed by ESCRT-III. *PLoS Comput Biol*. 5:e1000575.
- 642 Hanson, P.I., R. Roth, Y. Lin, and J.E. Heuser. 2008. Plasma membrane deformation by circular arrays of ESCRT-  
643 III protein filaments. *The Journal of cell biology*. 180:389-402.
- 644 Henne, W.M., N.J. Buchkovich, Y. Zhao, and S.D. Emr. 2012. The endosomal sorting complex ESCRT-II mediates  
645 the assembly and architecture of ESCRT-III helices. *Cell*. 151:356-371.
- 646 Henne, W.M., H. Stenmark, and S.D. Emr. 2013. Molecular mechanisms of the membrane sculpting ESCRT  
647 pathway. *Cold Spring Harb Perspect Biol*. 5.
- 648 Hulikova, A., and P. Swietach. 2014. Rapid CO<sub>2</sub> permeation across biological membranes: implications for CO<sub>2</sub>  
649 venting from tissue. *FASEB journal : official publication of the Federation of American Societies for  
650 Experimental Biology*. 28:2762-2774.
- 651 Hurley, J.H. 2015. ESCRTs are everywhere. *The EMBO journal*. 34:2398-2407.
- 652 Ivanchenko, S., W.J. Godinez, M. Lampe, H.G. Krausslich, R. Eils, K. Rohr, C. Brauchle, B. Muller, and D.C.  
653 Lamb. 2009. Dynamics of HIV-1 assembly and release. *PLoS Pathog*. 5:e1000652.
- 654 Johnson, D.S., R. Toledo-Crow, A.L. Mattheyses, and S.M. Simon. 2014. Polarization-controlled TIRFM with focal  
655 drift and spatial field intensity correction. *Biophysical journal*. 106:1008-1019.
- 656 Jouvenet, N., P.D. Bieniasz, and S.M. Simon. 2008. Imaging the biogenesis of individual HIV-1 virions in live cells.  
657 *Nature*. 454:236-240.
- 658 Jouvenet, N., S.M. Simon, and P.D. Bieniasz. 2009. Imaging the interaction of HIV-1 genomes and Gag during  
659 assembly of individual viral particles. *Proceedings of the National Academy of Sciences of the United  
660 States of America*. 106:19114-19119.
- 661 Jouvenet, N., M. Zhadina, P.D. Bieniasz, and S.M. Simon. 2011. Dynamics of ESCRT protein recruitment during  
662 retroviral assembly. *Nature cell biology*. 13:394-401.
- 663 Katzmann, D.J., M. Babst, and S.D. Emr. 2001. Ubiquitin-dependent sorting into the multivesicular body pathway  
664 requires the function of a conserved endosomal protein sorting complex, ESCRT-I. *Cell*. 106:145-155.

- 665 Katzmann, D.J., C.J. Stefan, M. Babst, and S.D. Emr. 2003. Vps27 recruits ESCRT machinery to endosomes during  
666 MVB sorting. *The Journal of cell biology*. 162:413-423.
- 667 Kooijman, E.E., K.E. King, M. Gangoda, and A. Gericke. 2009. Ionization properties of phosphatidylinositol  
668 polyphosphates in mixed model membranes. *Biochemistry*. 48:9360-9371.
- 669 Kozlovsky, Y., and M.M. Kozlov. 2003. Membrane fission: model for intermediate structures. *Biophysical journal*.  
670 85:85-96.
- 671 Lata, S., G. Schoehn, A. Jain, R. Pires, J. Piehler, H.G. Gottlinger, and W. Weissenhorn. 2008. Helical structures of  
672 ESCRT-III are disassembled by VPS4. *Science*. 321:1354-1357.
- 673 Lee, I.H., H. Kai, L.A. Carlson, J.T. Groves, and J.H. Hurley. 2015. Negative membrane curvature catalyzes  
674 nucleation of endosomal sorting complex required for transport (ESCRT)-III assembly. *Proceedings of the*  
675 *National Academy of Sciences of the United States of America*. 112:15892-15897.
- 676 Martin-Serrano, J., A. Yarovoy, D. Perez-Caballero, and P.D. Bieniasz. 2003. Divergent retroviral late-budding  
677 domains recruit vacuolar protein sorting factors by using alternative adaptor proteins. *Proceedings of the*  
678 *National Academy of Sciences of the United States of America*. 100:12414-12419.
- 679 McCullough, J., A.K. Clippinger, N. Talledge, M.L. Skowyra, M.G. Saunders, T.V. Naismith, L.A. Colf, P.  
680 Afonine, C. Arthur, W.I. Sundquist, P.I. Hanson, and A. Frost. 2015. Structure and membrane remodeling  
681 activity of ESCRT-III helical polymers. *Science*. 350:1548-1551.
- 682 Miesenbock, G., D.A. De Angelis, and J.E. Rothman. 1998. Visualizing secretion and synaptic transmission with  
683 pH-sensitive green fluorescent proteins. *Nature*. 394:192-195.
- 684 Morita, E., L.A. Colf, M.A. Karren, V. Sandrin, C.K. Rodesch, and W.I. Sundquist. 2010. Human ESCRT-III and  
685 VPS4 proteins are required for centrosome and spindle maintenance. *Proceedings of the National Academy*  
686 *of Sciences of the United States of America*. 107:12889-12894.
- 687 Morita, E., V. Sandrin, J. McCullough, A. Katsuyama, I. Baci Hamilton, and W.I. Sundquist. 2011. ESCRT-III  
688 protein requirements for HIV-1 budding. *Cell host & microbe*. 9:235-242.
- 689 Muziol, T., E. Pineda-Molina, R.B. Ravelli, A. Zamborlini, Y. Usami, H. Gottlinger, and W. Weissenhorn. 2006.  
690 Structural basis for budding by the ESCRT-III factor CHMP3. *Developmental cell*. 10:821-830.
- 691 Obita, T., S. Saksena, S. Ghazi-Tabatabai, D.J. Gill, O. Perisic, S.D. Emr, and R.L. Williams. 2007. Structural basis  
692 for selective recognition of ESCRT-III by the AAA ATPase Vps4. *Nature*. 449:735-739.
- 693 Pedelacq, J.D., S. Cabantous, T. Tran, T.C. Terwilliger, and G.S. Waldo. 2006. Engineering and characterization of  
694 a superfolder green fluorescent protein. *Nature biotechnology*. 24:79-88.
- 695 Saksena, S., J. Wahlman, D. Teis, A.E. Johnson, and S.D. Emr. 2009. Functional reconstitution of ESCRT-III  
696 assembly and disassembly. *Cell*. 136:97-109.
- 697 Schneider, C.A., W.S. Rasband, and K.W. Eliceiri. 2012. NIH Image to ImageJ: 25 years of image analysis. *Nature*  
698 *methods*. 9:671-675.
- 699 Simon, S., D. Roy, and M. Schindler. 1994. Intracellular pH and the control of multidrug resistance. *Proceedings of*  
700 *the National Academy of Sciences of the United States of America*. 91:1128-1132.
- 701 Stuchell-Brereton, M.D., J.J. Skalicky, C. Kieffer, M.A. Karren, S. Ghaffarian, and W.I. Sundquist. 2007. ESCRT-  
702 III recognition by VPS4 ATPases. *Nature*. 449:740-744.
- 703 Sund, S.E., J.A. Swanson, and D. Axelrod. 1999. Cell membrane orientation visualized by polarized total internal  
704 reflection fluorescence. *Biophysical journal*. 77:2266-2283.
- 705 van Paridon, P.A., B. de Kruijff, R. Ouwkerk, and K.W. Wirtz. 1986. Polyphosphoinositides undergo charge  
706 neutralization in the physiological pH range: a 31P-NMR study. *Biochim Biophys Acta*. 877:216-219.
- 707 Wollert, T., C. Wunder, J. Lippincott-Schwartz, and J.H. Hurley. 2009. Membrane scission by the ESCRT-III  
708 complex. *Nature*. 458:172-177.
- 709 Woodward, C.L., S.N. Cheng, and G.J. Jensen. 2015. Electron cryotomography studies of maturing HIV-1 particles  
710 reveal the assembly pathway of the viral core. *Journal of virology*. 89:1267-1277.
- 711 Wright, E.R., J.B. Schooler, H.J. Ding, C. Kieffer, C. Fillmore, W.I. Sundquist, and G.J. Jensen. 2007. Electron  
712 cryotomography of immature HIV-1 virions reveals the structure of the CA and SP1 Gag shells. *The EMBO*  
713 *journal*. 26:2218-2226.
- 714 Yang, B., G. Stjepanovic, Q. Shen, A. Martin, and J.H. Hurley. 2015. Vps4 disassembles an ESCRT-III filament by  
715 global unfolding and processive translocation. *Nature structural & molecular biology*. 22:492-498.
